# Supplementary material for: Molecular Targets for Cannabinoids in Natural Killer Cells: Do They Modulate the Antitumor Activity?
Source: MDPI journal article supplement (doi:10.3390/receptors3020007), 2024-03-25
Supplement: s1 [file s1]

Archive with 3 entries (3 files):
- Supplementary Table S1.pdf
- Supplementary Table S2.pdf
- Supplementary Table S3.pdf
