# Supplementary material for: Molecular Targets for Cannabinoids in Natural Killer Cells: Do They Modulate the Antitumor Activity?
Source: MDPI journal article supplement (doi:10.3390/receptors3020007), 2024-03-25
Supplement: s1 [file s1]

**Supplementary Table S1: Expression of cannabinoids targets in NK cells**

| Target                                       | Cell model                                                                                                                    | Method                                                                 | SL             | Observation                                                                                                                                                                                 | Reference               |
|----------------------------------------------|-------------------------------------------------------------------------------------------------------------------------------|------------------------------------------------------------------------|----------------|---------------------------------------------------------------------------------------------------------------------------------------------------------------------------------------------|-------------------------|
| <b>GPCRs</b>                                 |                                                                                                                               |                                                                        |                |                                                                                                                                                                                             |                         |
| CB1                                          | Primary human NK cells isolated from peripheral blood of healthy donors                                                       | RT-PCR                                                                 | ND             | Rank order of CB1 RNA level: B cells > NK cells >> monocytes > polymorphonuclear cells > CD8 cells > CD4+ cells<br>In NK: low level when compared to CB2                                    | <a href="#">21</a>      |
|                                              | Primary human NK cells isolated from peripheral blood of healthy donors                                                       | RT-PCR                                                                 | ND             | CB1 << CB2                                                                                                                                                                                  | <a href="#">23</a>      |
|                                              | Human uterine NK cells isolated after elected pregnancy termination or abortion                                               | RT-PCR                                                                 | ND             | High level, CB1 = CB2                                                                                                                                                                       | <a href="#">26</a>      |
| CB2                                          | NK cells infiltrating tumor in tissue sections of non-small cells lung cancer (sections from human patients and murine model) | In situ hybridization/immunofluorescence, microscopy of tumor sections | ND             | CB1 mRNA low level                                                                                                                                                                          | <a href="#">25</a>      |
|                                              | Primary human NK cells isolated from peripheral blood of healthy donors                                                       | RT-PCR                                                                 | ND             | CB2 >> CB1<br>Rank order of RNA level: B cells > NK cells >> monocytes > polymorphonuclear cells > CD8 cells > CD4+ cells                                                                   | <a href="#">21</a>      |
|                                              | Primary human NK cells isolated from peripheral blood of healthy donors                                                       | RT-PCR                                                                 | ND             | CB2 >> CB1                                                                                                                                                                                  | <a href="#">23</a>      |
|                                              | Human uterine NK cells isolated after elected pregnancy termination or abortion                                               | RT-PCR                                                                 | ND             | High level, CB1 = CB2                                                                                                                                                                       | <a href="#">26</a>      |
|                                              | Primary human NK cells isolated from peripheral blood of healthy donors                                                       | Flow cytometry<br>Fluorescent microscopy                               | PM             | Highest expression in NK cells in comparison to other leukocytes. High variation from donor to donor.                                                                                       | <a href="#">22</a>      |
|                                              | NK KHYG1 cell line                                                                                                            | Northern blot                                                          | ND             | High CB2 mRNA level                                                                                                                                                                         | <a href="#">27</a>      |
|                                              | NK cells infiltrating tumor in tissue sections of non-small cells lung cancer (sections from human patients and murine model) | In situ hybridization/immunofluorescence, microscopy                   | ND             | High CB2 mRNA level<br>Rank order in human: NK >> CD3/CD8 cells and M2 macrophages<br>Rank order in mice: NK ≈ M2 macrophages, CD3 cells > CD8 and myeloid cells                            | <a href="#">25</a>      |
| GPR18                                        | Human cytokine-induced killer cells: CD3-CD56+ (NK) and CD3+CD56+ (NKT)                                                       | Flow cytometry                                                         | ND             | No CB2 expression was determined in freshly isolated NK and NKT cells. After 14 days of incubation with cytokines (IL2, IFN $\gamma$ ), 98% of NKT were CB2-positive.                       | <a href="#">28</a>      |
|                                              | Human cytokine-induced killer cells: CD3-CD56+ (NK) and CD3+CD56+ (NKT)                                                       | Immunocytochemistry and flow cytometry                                 | PM and cytosol | Differential expression depending on cytokines' concentration during in vitro incubation (14 days)                                                                                          | <a href="#">29</a>      |
|                                              | human NK cells differentiated in vitro from umbilical cord – derived CD34+ cells                                              | Microarray analysis                                                    | ND             |                                                                                                                                                                                             | <a href="#">30</a>      |
|                                              | Primary human NK cells                                                                                                        | Flow cytometry, Western blot, confocal microscopy                      | PM             | Upregulation of the receptor in differentiated NK cells<br>Stimulation increases NK cytotoxicity against K562 target cells.<br>Stimulation increases granzyme B and IFN $\gamma$ production | <a href="#">31</a>      |
|                                              | Enriched Primary murine NK cells population from splenocytes                                                                  | Western blot from nucleate lysates and RT-PCR                          | ND             | Low D2 mRNA levels in comparison to other dopamine receptors. Stimulation decreases NK cytotoxicity against YAC-1 target cells                                                              | <a href="#">32</a>      |
| 5HT1A                                        | Primary human NK cells isolated from peripheral blood of healthy donors                                                       | Functional assays with the 5-HT1A receptor antagonist                  | ND             | Stimulation increases NK cytotoxicity against target cells<br>Stimulation promote NK proliferation<br>Stimulation favors antigen dependent cell contact                                     | <a href="#">33</a>      |
|                                              | Primary human NK cells isolated from peripheral blood of healthy donors                                                       | Functional assays with the 5-HT1A receptor antagonist                  | ND             | Antagonism decreases NK cytotoxicity against target cells                                                                                                                                   | <a href="#">34</a>      |
| $\delta$ / $\mu$ / $\kappa$ opioid receptors | Primary human NK cells isolated from peripheral blood of healthy donors                                                       | RT-PCR                                                                 | ND             | Rank order of opioid receptors expression is $\mu$ > $\kappa$ > $\delta$                                                                                                                    | <a href="#">36</a>      |
|                                              | Murine RNK16 cell line                                                                                                        | Fluorescent microscopy in non-permeabilized cells                      | PM             | Stimulation increases perforin, granzyme B and IFN $\gamma$ production                                                                                                                      | <a href="#">37</a>      |
| <b>Ion channels</b>                          |                                                                                                                               |                                                                        |                |                                                                                                                                                                                             |                         |
| VGSCs                                        | Primary human NK cells isolated from peripheral blood of healthy donors                                                       | Functional assays in the presence of the channel agonist               | ND             | agonists induces depolarization and cytotoxicity inhibition against K562 target cells                                                                                                       | <a href="#">73</a>      |
| VGCCs                                        | -Primary murine NK cells -<br>Primary human NK cells isolated from peripheral blood of healthy donors                         | RNA-Seq                                                                | ND             | Human NK cells express higher levels of the mRNA of the subunits of VGCCs in comparison to murine NK cells                                                                                  | <a href="#">76</a>      |
| VDAC 1                                       | Primary human NK cells isolated from peripheral blood of healthy donors                                                       | Microarray analysis                                                    | ND             | Expression correlates with NK infiltration to tumors                                                                                                                                        | <a href="#">79, 137</a> |
| TRPM8                                        | Primary human NK cells isolated from peripheral blood of healthy donors                                                       | PCR and SNP analysis                                                   | ND             | SNPs reduces NK cytotoxic activity against K562 cells                                                                                                                                       | <a href="#">59</a>      |

|                          |                                                                                                                        |                                                            |    |                                                                                                                                                                                                       |         |
|--------------------------|------------------------------------------------------------------------------------------------------------------------|------------------------------------------------------------|----|-------------------------------------------------------------------------------------------------------------------------------------------------------------------------------------------------------|---------|
| TRPV1                    | -Primary human NK cells isolated from peripheral blood of healthy donors<br>-NKL cell line<br>-Primary murine NK cells | Western blot of total lysate                               | ND | Stimulation limits NK degranulation against K562 or 221 target cells; Decreases NKL cytotoxicity against target cells; Increases intracellular calcium;                                               | 51      |
|                          | Primary murine NK cells                                                                                                | Functional assays in the presence of channel antagonist    | ND | Antagonism promotes NK enrichment                                                                                                                                                                     | 138     |
| TRPV2                    | Primary murine NK cells<br>Primary human NK cells                                                                      | RNA-seq                                                    | ND | Depending on the source NK cells expression ranges from 10-30-fold times higher to any other tissue                                                                                                   | 139     |
| GABAA                    | Primary murine NK cells<br>Primary human NK cells isolated from peripheral blood of healthy donors                     | RT-PCR                                                     | ND | Stimulation decreases NK degranulation against YAC-1 target cells                                                                                                                                     | 68      |
| Glycine receptor alpha 2 | Primary human NK cells isolated from peripheral blood of healthy donors                                                | Flow cytometry                                             | ND | NK cells express higher levels of GlyR subunits in comparison to monocytes                                                                                                                            | 71      |
| AChRs                    | Primary human NK cells                                                                                                 | PCR and SNP analysis                                       | ND | SNPs reduces NK cytotoxic activity against K562 cells                                                                                                                                                 | 59      |
| <b>Enzymes</b>           |                                                                                                                        |                                                            |    |                                                                                                                                                                                                       |         |
| CYP1B1                   | Primary human NK cells                                                                                                 | RNA-seq                                                    | ND | Naïve NK cells express lower levels of the protein in comparison to expanded NK cells in vitro. Increased expression correlates with metabolism perturbations and NK-dysfunction against target cells | 80      |
| CYP3A4                   | Primary human NK from lymphoma                                                                                         | RT-PCR                                                     | ND | Expression correlates with chemoresistance                                                                                                                                                            | 81      |
| CYP3A5                   | Primary human NK from lymphoma                                                                                         | RT-PCR                                                     | ND | Expression correlates with chemoresistance                                                                                                                                                            | 81      |
| CYP3A7                   | Primary human NK from lymphoma                                                                                         | RT-PCR                                                     | ND | Expression correlates with chemoresistance                                                                                                                                                            | 81      |
| PLA 2                    | Primary human NK cells isolated from peripheral blood of healthy donors                                                | Functional assays in the presence of PLA inhibitor         | ND | Inhibition decreases NK cytotoxicity against K562/RL1 target cells                                                                                                                                    | 84, 85  |
|                          | Primary human adherent NK cells                                                                                        | Functional assays in NK cells with enriched PLA expression | ND | Inhibition decreases NK cytotoxicity against K562 target cells. Overexpression enhances NK cytotoxicity against K562, MOLT-4 & U937 target cells                                                      | 140     |
| COX 2                    | Nasal type extra nodal NK cell lymphoma                                                                                | Immunohistochemistry                                       | C  | Expression levels correlates with poor survival                                                                                                                                                       | 87      |
| FAAH                     | Primary murine NK cells                                                                                                | Functional assays in the presence of the protein inhibitor | ND | Inhibition decreases NK migration/infiltration                                                                                                                                                        | 93      |
| ETC Complex I            | Primary human NK cells isolated from peripheral blood of healthy donors                                                | Functional assays in the presence of the protein inhibitor | ND | Protein regulates NK metabolism and functional responses                                                                                                                                              | 96, 141 |
| ETC Complex II           | Primary human NK cells isolated from peripheral blood of healthy donors                                                | Functional assays in the presence of the protein inhibitor | ND | Protein regulates NK metabolism and functional responses                                                                                                                                              | 142     |
| ETC Complex IV           | Primary murine NK cells                                                                                                | Functional assays in the presence of the protein inhibitor | ND | NK impaired metabolism; impaired expansion upon infection                                                                                                                                             | 143     |
| <b>Transporters</b>      |                                                                                                                        |                                                            |    |                                                                                                                                                                                                       |         |
| P-gp                     | Primary human NK cells isolated from peripheral blood of healthy donors                                                | Flow cytometry                                             | ND | NK cells expresses higher levels of P-gp protein in comparison to other leukocytes. Inhibition decreases NK cytotoxicity against K562 target cells                                                    | 99      |
|                          | YTN cell line                                                                                                          | Functional assays in the presence of the protein inhibitor | ND | Inhibition decreases YTN cytotoxicity against target cells                                                                                                                                            | 100     |
|                          | Primary NK cells enriched from human umbilical cord and peripheral NK cells from healthy donors                        | Indirect immunocytofluorescence                            | PM | Higher expression of P-gp was observed in umbilical cord cells in comparison to peripheral NK cells                                                                                                   | 101     |
|                          | Primary NK leukemia (Aggressive Natural Killer Leukemia; ANKL)                                                         | Flow cytometry                                             | ND | High P-gp levels was observed in oncological phenotype of NK cells                                                                                                                                    | 102     |
| ABCG2                    | Nasal type extra nodal NK cell lymphoma                                                                                | RT-PCR<br>Western blot                                     | ND | Expression confers chemoresistance                                                                                                                                                                    | 105     |
| FABP5                    | Primary murine lung NK cells                                                                                           | Functional assays with FABP5 -/- NK cells                  | ND | Deficiency leads to decreased granzyme B and IFN $\gamma$ production Deficiency impairs NK maturation Deficiency in NK cells favors lung tumor metastasis                                             | 106     |
| ENT1                     | Primary human NK cells<br>YTS human cell line: NK cells derived from a patient with acute lymphoblastic leukemia       | RT-qPCR                                                    | ND | NK from oncological donors express higher levels of the protein                                                                                                                                       | 144     |
|                          | Nasal type extra nodal NK cell lymphoma/ YTN cell line                                                                 | RT-PCR                                                     | ND | Expression favors gemcitabine uptake and cytotoxicity                                                                                                                                                 | 145     |

SL: Subcellular location; C: cytosol; M: mitochondria; PM: plasmatic membrane; N: nucleus.

CYP: cytochrome P450; HMG-CoAr: 3-hydroxy-3-methylglutaryl-CoA reductase; PLA: phospholipase A; COX: cyclooxygenase; FAAH: Fatty acid amide hydrolase; ETC: electron transport chain; VGSCs: voltage gated sodium channels; VGCCs: voltage gated calcium channels; VDAC: voltage dependent anion channel; TRP: transient receptor potential; GABA: gamma-aminobutyric acid; GlyR: Glycerin receptor; AChR: acetylcholine receptor; D2: dopamine receptor 2; 5HT: 5-hydroxytryptamine receptor; P-gp: P glycoprotein; FABP: Fatty acid-binding protein; ENT: equilibrative nucleoside transporter.
