# Supplementary material for: Molecular Targets for Cannabinoids in Natural Killer Cells: Do They Modulate the Antitumor Activity?
Source: MDPI journal article supplement (doi:10.3390/receptors3020007), 2024-03-25
Supplement: s1 [file s1]

**Supplementary Table S3.** Effect of the cannabinoids on the molecular entities, participating in the interaction between NK and target cells.

| Receptor         | Ligand             | Activity | Effect of cannabinoids                                                                                                                                                                                                                                                                                                                                                                               | Reference                    |
|------------------|--------------------|----------|------------------------------------------------------------------------------------------------------------------------------------------------------------------------------------------------------------------------------------------------------------------------------------------------------------------------------------------------------------------------------------------------------|------------------------------|
| <b>KIR</b>       |                    |          |                                                                                                                                                                                                                                                                                                                                                                                                      |                              |
| KIR2DL2/3        | HLA-C1             | I        | THC upregulates KIR2DL2 RNA levels                                                                                                                                                                                                                                                                                                                                                                   | <a href="#">151</a>          |
| KIR3DL1          | HLA-Bw4, HLA-A     | I        | THC (0.03 mg/kg) upregulates HLA-A expression                                                                                                                                                                                                                                                                                                                                                        | <a href="#">151</a>          |
| <b>CD94-NKG2</b> |                    |          |                                                                                                                                                                                                                                                                                                                                                                                                      |                              |
| NKG2C            | HLA-E              | A        | THC increases NKG2 RNA expression                                                                                                                                                                                                                                                                                                                                                                    | <a href="#">151</a>          |
| NKG2E            | HLA-E              | A        |                                                                                                                                                                                                                                                                                                                                                                                                      |                              |
| NKG2D            | MIC-A, -B; ULBP1-4 | A        | Exposure to SR141716 increases glioma cells susceptibility to NK cell mediated cytotoxicity through the upregulation of NKG2D ligand MICA/B. NK cells exposed to CBD (10 $\mu$ M) does not exhibit any change in NKG2D                                                                                                                                                                               | <a href="#">29, 148, 149</a> |
| <b>NCR5</b>      |                    |          |                                                                                                                                                                                                                                                                                                                                                                                                      |                              |
| NKp30            | BAT-3, HSPG, B7-H6 | A        | THC (75 mg/kg) downregulates B7 (CD86) expression in lung mice cells.                                                                                                                                                                                                                                                                                                                                | <a href="#">152</a>          |
| NKp44            | VIRAL HA           | A        |                                                                                                                                                                                                                                                                                                                                                                                                      |                              |
| NKp46            | VIRAL HA, HSPG     | A        | CB2 KO favors NK cell NKp46 expression within the tumor microenvironment                                                                                                                                                                                                                                                                                                                             | <a href="#">25</a>           |
| LILR             | MHC-I UL18         | I        | Cannabinoids differentially induce MHC-I expression in colorectal cancer cells: THC (27 $\mu$ M) 6.1-fold, CBDV (20 $\mu$ M) 5.5 fold, CBV (20 $\mu$ M) 3.9 fold, CBD (11 $\mu$ M) 3.3 fold, CBG (38.9 $\mu$ M) 2.7 fold, CBN (28 $\mu$ M) 1.8 fold, CBC (26 $\mu$ M) 1.6 fold. Synthetic cannabinoid SR141716 does not affect MHC-I in glioblastoma cells WIN55212-2 increases MHC-I in target cell | <a href="#">148, 153</a>     |
| KLRG1            | Cadherins          | I        | KLRG1 expression is downregulated in cannabis consumers. KLRG1 expression is dependent on CB2 expression                                                                                                                                                                                                                                                                                             | <a href="#">154, 155</a>     |
| PILR             | CD99               | A        | CBD (5 $\mu$ M) downregulates CD99 expression in MSCs                                                                                                                                                                                                                                                                                                                                                | <a href="#">156</a>          |
| PD1              | PD1L               | I        | WIN55-212-2 increases PD-L1 in cancer cells                                                                                                                                                                                                                                                                                                                                                          | <a href="#">149</a>          |
| CD69             |                    |          | O1602 favor CD69 overexpression, a functional marker triggering the NK cytotoxicity                                                                                                                                                                                                                                                                                                                  | <a href="#">31</a>           |
| FasL             | Fas                | A        | AEA induced FAS recruitment to plasma membrane in cancer cell; CBD promotes FasL expression; THC; JWH133 and SR141716 decreases Fas and FasL expression                                                                                                                                                                                                                                              | <a href="#">157-160</a>      |
| TRAIL            | DR5                | A        | WIN55212-2 favors DR5 expression in TRAIL resistant cancers; CBD substantially upregulates TNF/TNFR1 and TRAIL/TRAIL-R2 signaling by modulation of both ligand and receptor levels                                                                                                                                                                                                                   | <a href="#">161, 162</a>     |
