# Supplementary material for: Molecular Targets for Cannabinoids in Natural Killer Cells: Do They Modulate the Antitumor Activity?
Source: MDPI journal article supplement (doi:10.3390/receptors3020007), 2024-03-25
Supplement: s1 [file s1]

**Supplementary Table S2: Effect of cannabinoids on NK function**

| Ligand                           | Putative CTs                                                                               | Experimental model                                                                                                                             | Effect in NK cell                                                                                                                                                                                                                     | Reference           |
|----------------------------------|--------------------------------------------------------------------------------------------|------------------------------------------------------------------------------------------------------------------------------------------------|---------------------------------------------------------------------------------------------------------------------------------------------------------------------------------------------------------------------------------------|---------------------|
| <b>Endocannabinoids</b>          |                                                                                            |                                                                                                                                                |                                                                                                                                                                                                                                       |                     |
| AEA (10 $\mu$ M)                 | CB1, CB2: partial agonist GPR55: agonist GPR18: full agonist TRPV1: agonist                | Primary human uNK cells                                                                                                                        | Administration enhances IFN $\gamma$ and TNF $\alpha$ production by NK cells                                                                                                                                                          | <a href="#">26</a>  |
| PEA (1200mg /day)                | GPR55: agonist                                                                             | Primary human NK cells                                                                                                                         | Administration increased circulating NK cells                                                                                                                                                                                         | <a href="#">135</a> |
| 2-AG (1 $\mu$ M)                 | CB1: Full agonist CB2: partial agonist GPR55: agonist                                      | KHYG-1 cell line                                                                                                                               | 2-AG act as a chemotactic stimulus, enhancing NK cell migration                                                                                                                                                                       | <a href="#">27</a>  |
| <b>Phytocannabinoids</b>         |                                                                                            |                                                                                                                                                |                                                                                                                                                                                                                                       |                     |
| CBD (2.5 mg/kg/day)              | GPR18: partial agonist GPR55: antagonist CB1: antagonist CB2: antagonist TRPV2: activation | Primary murine circulating NK cells                                                                                                            | Increases the total and percentage NKT cells and NK cells                                                                                                                                                                             | <a href="#">117</a> |
| CBD (5 mg/kg/day))               |                                                                                            | Primary murine circulating NK cells                                                                                                            | No effect in the total numbers of NK and NKT                                                                                                                                                                                          | <a href="#">117</a> |
| CBD (1 - 20 $\mu$ M)             |                                                                                            | Cytokine-induced killer (CIK) CD3+CD56+ NKT cells. Activation of peripheral mononuclear cells with IFN $\gamma$ , IL1b and antiCD3 antibodies. | Protective effect of CBD against spontaneous lysis in vitro. Enhanced NKT cells number at 1 $\mu$ M. Cytotoxicity of NKT cells against myeloid cells was not affected at low, but inhibition at high CBD concentration.               | <a href="#">28</a>  |
| CBD                              |                                                                                            | Primary human NK cells                                                                                                                         | Diminishes the production of cytokines, perforins and granzymes caused by the activation of GPR55 by O-1602                                                                                                                           | <a href="#">31</a>  |
| $\Delta$ 9-THC (1-20 $\mu$ g/mL) | CB1, CB2: partial agonist GPR55: agonist GPR18: full agonist TRPV2: activation             | Primary murine splenic NK cells. YAC-1 lymphoma cells as targets.                                                                              | Inhibits the cytotoxic activity against target cells                                                                                                                                                                                  | <a href="#">122</a> |
| $\Delta$ 9-THC (1-20 $\mu$ g/mL) |                                                                                            | Primary murine splenic NK cells. YAC-1 lymphoma cells as targets.                                                                              | Inhibits the cytotoxic activity against target cells                                                                                                                                                                                  | <a href="#">121</a> |
| $\Delta$ 9-THC (1-20 $\mu$ g/mL) |                                                                                            | Primary human NK cells                                                                                                                         | Inhibits the cytotoxic activity against K562 target cells                                                                                                                                                                             | <a href="#">123</a> |
| $\Delta$ 9-THC (1-10 $\mu$ g/mL) |                                                                                            | Primary murine splenic NK cells                                                                                                                | Inhibits the cytotoxic activity against YAC-1 target cells Inhibition of proliferation                                                                                                                                                | <a href="#">116</a> |
|                                  |                                                                                            | KHYG-1 cell line                                                                                                                               | Inhibits NK response to chemotactic stimulus                                                                                                                                                                                          | <a href="#">27</a>  |
| $\Delta$ 9-THC (15 mg/kg)        |                                                                                            | Primary murine splenocytes<br>Pure NK population was not isolated                                                                              | Decreased cytolysis of tumor YAC-1 cells co-cultivated with splenocytes                                                                                                                                                               | <a href="#">120</a> |
| <b>Synthetic Cannabinoids</b>    |                                                                                            |                                                                                                                                                |                                                                                                                                                                                                                                       |                     |
| ACEA (5-20 $\mu$ M)              | CB1 agonist                                                                                | Primary human NK cells                                                                                                                         | No effect on NK cell cytotoxicity against target cells.                                                                                                                                                                               | <a href="#">126</a> |
| AM251                            | CB1: antagonist/inverse agonist                                                            | Primary murine NK cells                                                                                                                        | Enhances NK population                                                                                                                                                                                                                | <a href="#">146</a> |
| CP-55940 (0.2-0.4 mg/kg)         | CB1, CB2: full agonist GPR55: agonist                                                      | Primary murine NK cells                                                                                                                        | Inhibits the cytotoxicity against YAC-1 target cells                                                                                                                                                                                  | <a href="#">124</a> |
| CP55940 (0.2 mg/kg)              |                                                                                            | Primary murine NK cells                                                                                                                        | inhibits NK cytotoxic activity                                                                                                                                                                                                        | <a href="#">121</a> |
| GW833972A                        | CB2 agonist                                                                                | Primary human NK cells                                                                                                                         | No effect on NK cell cytotoxicity against target cells, in contrast to effect on CD8+ cells                                                                                                                                           | <a href="#">126</a> |
| JWH133 (0-50 $\mu$ M)            | CB2: full agonist                                                                          | Primary murine NK cells                                                                                                                        | Decreases number of NK cells                                                                                                                                                                                                          | <a href="#">118</a> |
| O-1602                           | GPR55, GPR18: agonist                                                                      | primary human NK cells                                                                                                                         | Increases CD69 activation marker expression, potentiates target cell – dependent degranulation and death of target cells, potentiates production of granzyme B, IFN- $\gamma$ and TNF- $\alpha$ after stimulation with IL-2 and IL-12 | <a href="#">31</a>  |
| SR144528 (1 $\mu$ M)             | CB2: antagonist                                                                            | KHYG-1 cell line                                                                                                                               | Inhibits the migration                                                                                                                                                                                                                | <a href="#">27</a>  |
| SMM-189                          | SB2 inverse agonist                                                                        | Murine model of colitis                                                                                                                        | Decreases numbers of NK cells in the spleen                                                                                                                                                                                           | <a href="#">147</a> |
| SR141716 (0.3–40 $\mu$ M)        | CB1: antagonist GPR55: partial agonist                                                     | Primary human NK cells                                                                                                                         | Enhances NK cell-mediated cytotoxicity against U251 glioma cells                                                                                                                                                                      | <a href="#">148</a> |
| SR144528 (10 mg/kg)              | CB2 antagonist                                                                             | Primary murine NK cells                                                                                                                        | Does not affect effector function                                                                                                                                                                                                     | <a href="#">120</a> |
| WIN55212-2 (10–100 $\mu$ M)      | CB1, CB2: full agonist                                                                     | Primary murine NK cells                                                                                                                        | Increases cytotoxicity against PL12 and MP2 target cells increases the production and secretion of IFN- $\gamma$                                                                                                                      | <a href="#">149</a> |
| WIN55212-2 (0.5 mg/kg)           |                                                                                            | Primary murine NK cells                                                                                                                        | Increases number of NK cells                                                                                                                                                                                                          | <a href="#">150</a> |
